# Supplementary material for: Metabolic factors and hip fracture risk in a large Austrian cohort study
Source: PubMed Central journal article supplement — Bone Rep. 2020 Jan 13;12:100244. doi: 10.1016/j.bonr.2020.100244 (PMC6965713; doi:10.1016/j.bonr.2020.100244), 2020-01-13
Supplement: mmc1.pdf [file mmc1.pdf]

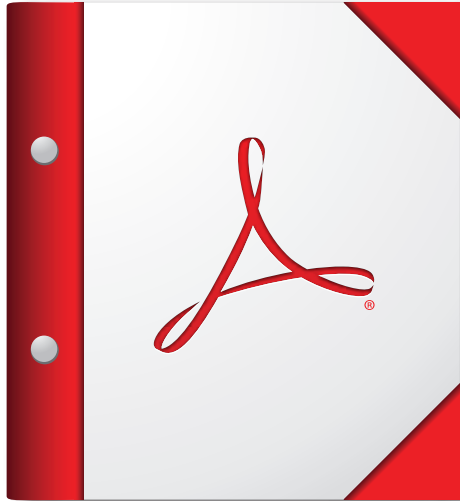

**For the best experience, open this PDF portfolio in  
Acrobat X or Adobe Reader X, or later.**

[Get Adobe Reader Now!](#)
